# Supplementary material
Source: PubMed Central journal article supplement (PMC6400749)

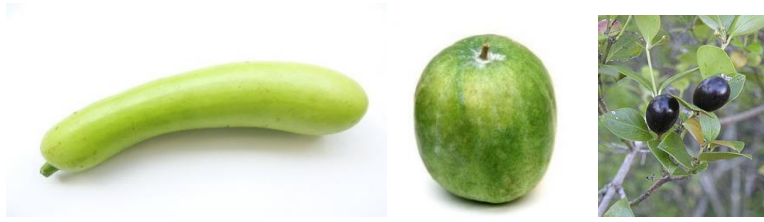

**Online Resource 1.** Bottle gourd, Ash gourd and Karwanda used in this study

Supplement: 13197_2019_3570_MOESM1_ESM.pdf [file 13197_2019_3570_MOESM1_ESM.pdf]
